# Supplementary material
Source: Springer Nature journal article supplement (https://www.springermedizin.de/resource/supplementary/13221_2010_5_MOESM3_ESM.pdf/9680802)

A

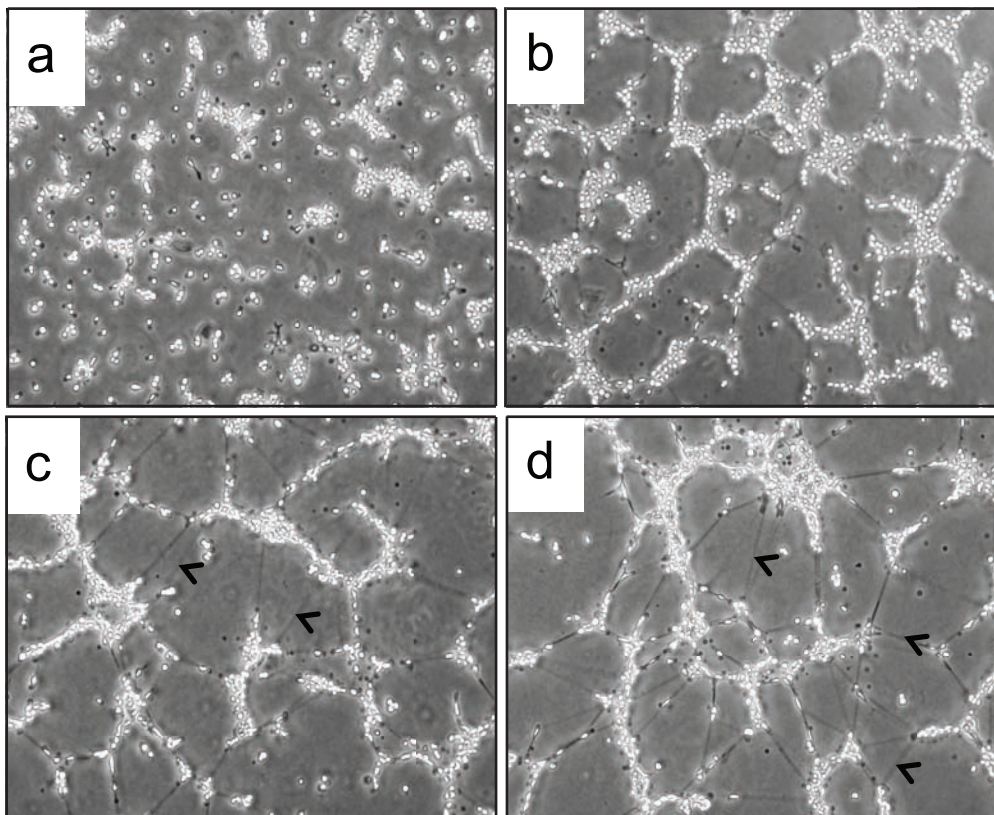

B

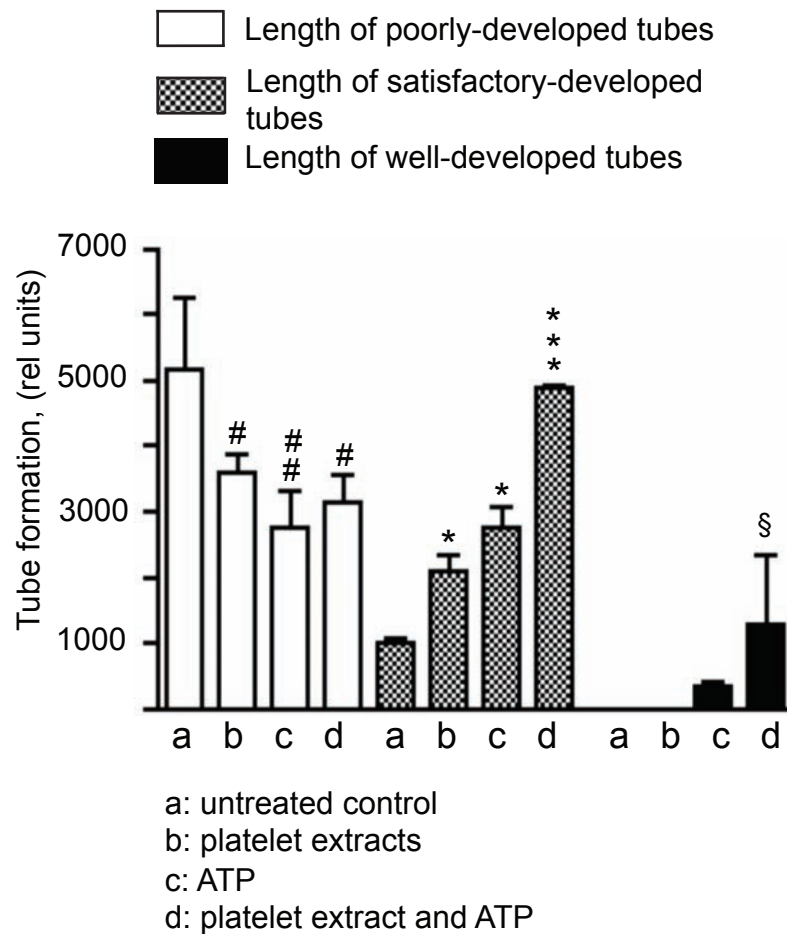

Supplement: MOESM3 [file 9680802]
